# Supplementary material for: Amentadione from the Alga Cystoseira usneoides as a Novel Osteoarthritis Protective Agent in an Ex Vivo Co-Culture OA Model
Source: PubMed Central journal article supplement (PMC7762386; doi:10.3390/md18120624), 2020-12-07
Supplement: marinedrugs-18-00624-s001.pdf [file marinedrugs-18-00624-s001.pdf]

# Amentadione from the Alga *Cystoseira usneoides* as a Novel Osteoarthritis Protective Agent in an *Ex Vivo* Co-Culture OA Model

Nuna Araújo <sup>1</sup>, Carla S. B. Viegas <sup>1,2</sup>, Eva Zubía <sup>3</sup>, Joana Magalhães <sup>4,5,6</sup>, Acácio Ramos <sup>7</sup>, Maria M. Carvalho <sup>7</sup>, Henrique Cruz <sup>7</sup>, João Paulo Sousa <sup>7</sup>, Francisco J. Blanco <sup>4,5</sup>, Cees Vermeer <sup>8</sup> and Dina C. Simes <sup>1,2,\*</sup>

<sup>1</sup> Centre of Marine Sciences (CCMAR), University of Algarve, Faro, 8005-139, Portugal; naraujo@ualg.pt (N.A.); caviegas@ualg.pt (C.S.B.V.)

<sup>2</sup> GenoGla Diagnostics, Centre of Marine Sciences (CCMAR), University of Algarve, Faro, 8005-139, Portugal; caviegas@ualg.pt (C.S.B.V.); dsimes@ualg.pt (D.C.S.)

<sup>3</sup> Department of Organic Chemistry, Faculty of Marine and Environmental Sciences, University of Cadiz, Puerto Real (Cádiz), 11510, Spain; eva.zubia@uca.es

<sup>4</sup> Unidad de Medicina Regenerativa. Grupo de Investigación en Reumatología (GIR). Instituto de Investigación Biomédica de A Coruña (INIBIC). Complejo Hospitalario Universitario de A Coruña (CHUAC). Sergas, A Coruña, Spain; joana.cristina.silva.magalhaes@sergas.es (J.M.); fblagar@sergas.es (F.J.B.)

<sup>5</sup> Universidade da Coruña (UDC), Agrupación Estratégica CICA-INIBIC. A Coruña, Spain

<sup>6</sup> Centro de Investigación Biomédica en Red (CIBER), Madrid, Spain

<sup>7</sup> Department of Orthopedics and Traumatology, Hospital Particular do Algarve (HPA), Gambelas-Faro, 8005-226, Portugal; acacioramos@gmail.com (A.R.); mariamiguelfc@gmail.com (M.M.C.); cruzhenrique@hotmail.com (H.C.); jprsous@gmail.com (J.P.S.)

<sup>8</sup> Cardiovascular Research Institute CARIM, Maastricht University, 6229 EV Maastricht, The Netherlands; cees.vermeer@outlook.com

\* Correspondence: dsimes@ualg.pt

Received: date; Accepted: date; Published: date

Figure S1: Chemical structure, NMR and HRMS data of amentadione (YP).

Figure S2: YP reduces the inflammatory response of THP-1 macrophages (THP-1 MOM) stimulated with LPS and hydroxyapatite (HAP).

Figure S3: Viability of THP-1 macrophage cells (THP-1 MOM) exposed to different concentrations of amentadione (YP) for 24 h and exposed to different concentrations of HAP for 72 h.

Figure S4: Viability of primary human chondrocytes and synoviocytes exposed to different amentadione (YP) concentrations for 24 h.

Figure S5: Viability of primary human chondrocytes and synoviocytes exposed to different hydroxyapatite (HAP) concentrations for 72 h.

Figure S6: Indication on the time point with increased pIkB $\alpha$  after IL-1 $\beta$  stimulation.

Table S1: Modified Mankin score used for histological evaluation of human cartilage explants.

Table S2: Gene-specific primers used for gene expression analysis by qPCR.

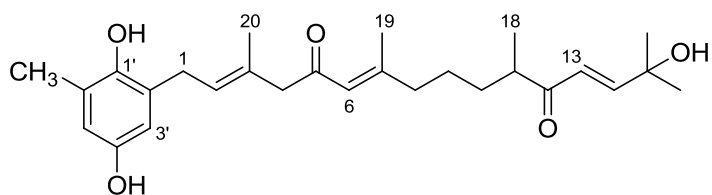

Amentadione (YP): yellowish oil;  $^1\text{H}$  NMR ( $\text{CD}_3\text{OD}$ , 500 MHz)  $\delta$  6.94 (1H, d,  $J$  = 15.8 Hz, H-14), 6.39 (2H, br s, H-3' and H-5'), 6.35 (1H, d,  $J$  = 15.8 Hz, H-13), 6.20 (1H, br s, H-6), 5.46 (1H, br t,  $J$  = 7.4 Hz, H-2), 3.31 (2H, d, overlapped with the solvent signal, H-1), 3.10 (2H, s, H-4), 2.85 (1H, m, H-11), 2.15 (3H, s, 6'-Me), 2.13 (2H, t,  $J$  = 7.2 Hz, H-8), 2.07 (3H, d,  $J$  = 1.2 Hz, Me-19), 1.69 (3H, br s, Me-20), 1.64 (1H, m, H-10a), 1.41 (2H, m, H-9), 1.32 (1H, m, H-10b), 1.32 (6H, s, Me-16 and Me-17), 1.06 (3H, d,  $J$  = 6.9 Hz, Me-18);  $^{13}\text{C}$  NMR ( $\text{CD}_3\text{OD}$ , 125 MHz)  $\delta$  206.7 (C, C-12), 202.2 (C, C-5), 160.8 (C, C-7), 155.2 (CH, C-14), 151.5 (C, C-4'), 146.5 (C, C-1'), 131.3 (C, C-3), 130.8 (C, C-2'), 129.3 (CH, C-2), 127.7 (C, C-6'), 125.6 (CH, C-13), 123.6 (CH, C-6), 115.9 (CH, C-5'), 114.6 (CH, C-3'), 71.3 (C, C-15), 56.2 ( $\text{CH}_2$ , C-4), 45.0 (CH, C-11), 42.0 ( $\text{CH}_2$ , C-8), 33.7 ( $\text{CH}_2$ , C-10), 29.9 ( $\text{CH}_2$ , C-1), 29.30 ( $\text{CH}_3$ , Me-16), 29.29 ( $\text{CH}_3$ , Me-17), 26.1 ( $\text{CH}_2$ , C-9), 19.4 ( $\text{CH}_3$ , Me-19), 17.1 ( $\text{CH}_3$ , Me-18), 16.9 ( $\text{CH}_3$ , 6'-Me), 16.6 ( $\text{CH}_3$ , Me-20); HRESIMS  $m/z$  441.2643  $[\text{M}-\text{H}]^-$  (calcd. for  $\text{C}_{27}\text{H}_{37}\text{O}_5$  441.2641).

**Figure S1.** Chemical structure, NMR and HRMS data of amentadione (YP).

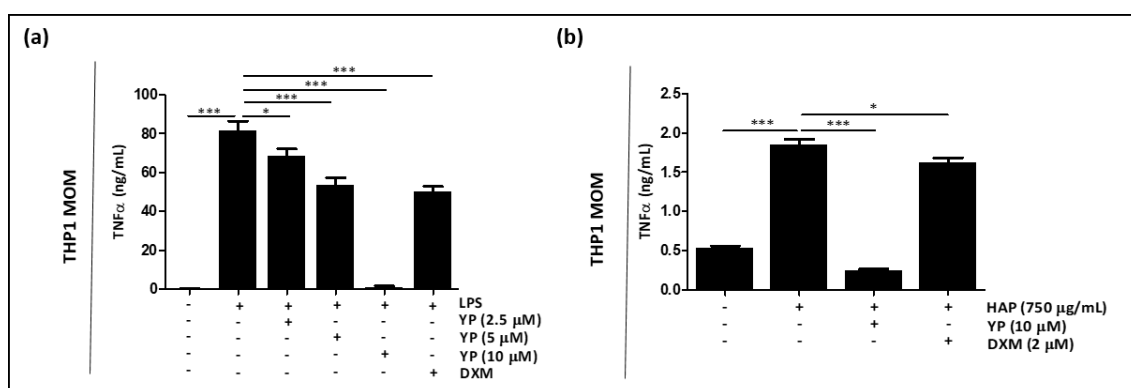

**Figure S2.** YP reduces the inflammatory response of THP-1 macrophages (THP-1 MOM) stimulated with LPS (a) and hydroxyapatite (HAP) (b). Levels of  $\text{TNF}\alpha$  in cell culture media of THP-1 MOM pre-treated with different concentrations of YP for 24 h, followed by exposure to 100 ng/ml LPS for additional 24h (a) and to 750  $\mu\text{g}/\text{mL}$  HAP for 72 h (b), determined by ELISA. Control (Ctr) corresponds to culture media of non-treated cells, and cells treated with 2  $\mu\text{M}$  dexamethasone (DXM) were used as a positive anti-inflammatory control. Data are presented as means of at least three independent experiments. All graphs show mean  $\pm$ SD. One-way Anova and multiple comparisons were achieved with the Dunnett's test. Statistical significance was defined as  $p \leq 0.05$  (\*),  $p \leq 0.005$  (\*\*), and  $p \leq 0.0005$  (\*\*\*)

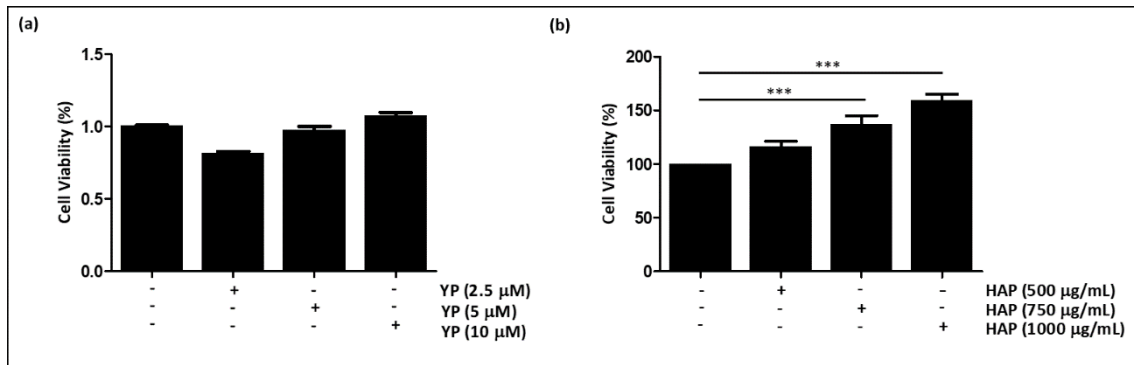

**Figure S3.** Viability of THP-1 macrophage cells (THP-1 MOM) exposed to different concentrations of amentadione (YP) for 24 h (a) and HAP for 72 h (b). Control (Ctr) corresponds to cell culture media of non-treated cells. Graph shows mean  $\pm$ SD. One-way Anova and multiple comparisons were achieved with the Dunnett's test. Statistical significance was defined as  $p \leq 0.0005$  (\*\*\*) .

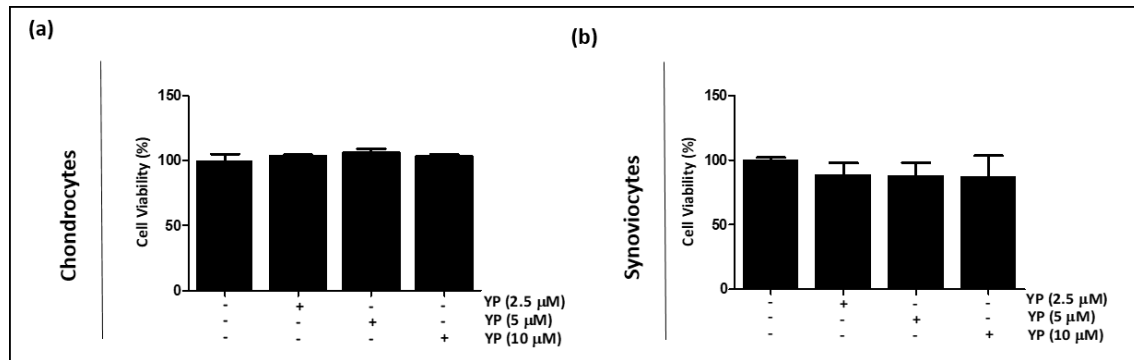

**Figure S4.** Viability of human primary chondrocytes (a) and synoviocytes (b) exposed to different amentadione (YP) concentrations for 24 h. Control (Ctr) corresponds to culture media of non-treated cells.

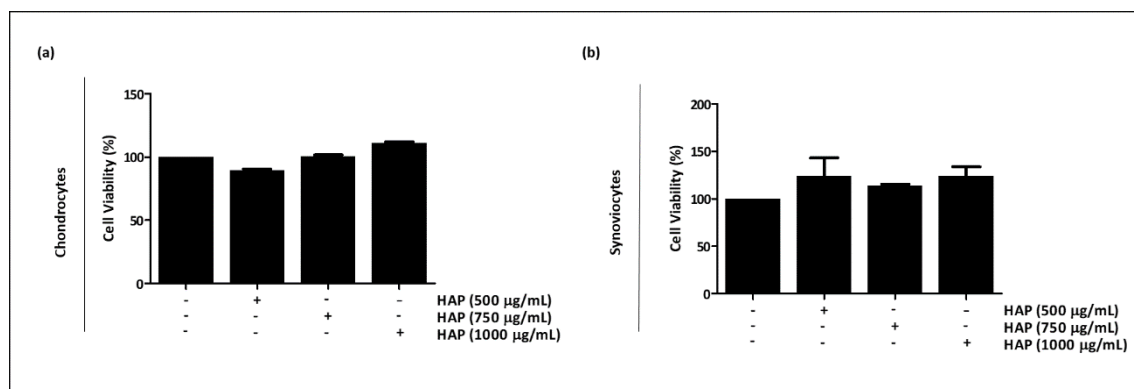

**Figure S5.** Viability of human primary chondrocytes (a) and synoviocytes (b) exposed to different hydroxyapatite (HAP) concentrations for 72 h. Control (Ctr) corresponds to culture media of non-treated cells.

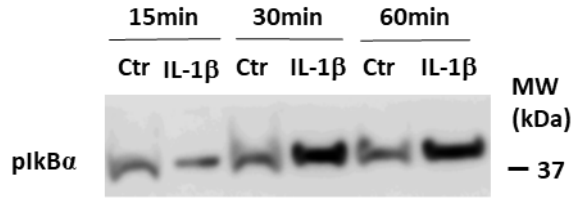

**Figure S6.** Indication on the time point with increased pIkB $\alpha$  after IL-1 $\beta$  stimulation. 20  $\mu$ g of total protein extracts of chondrocytes cultured in control (Ctr) and treated with 10 ng/mL IL-1 $\beta$  for different time points, were analysed by Western blot to detect pIkB $\alpha$ . Position of relevant molecular mass marker (kDa) is indicated on the right side.

**Table S1.** Modified Mankin score used for histological evaluation of human cartilage explants, using hematoxylin-eosin (HE), Safranin-O (SO) and Fast Green as staining

| ID Sample | Mankin Score |             |                 | Mankin Total Score |
|-----------|--------------|-------------|-----------------|--------------------|
|           | Structure    | Cellularity | Matrix Staining |                    |
| 1         | 0            | 0           | 1               | 1                  |
| 2         | 1            | 0           | 2               | 3                  |
| 3         | 1            | 1           | 2               | 4                  |
| 4         | 0            | 0           | 4               | 4                  |
| 5         | 0            | 0           | 1               | 1                  |
| 6         | 0            | 0           | 4               | 4                  |
| 7         | 2            | 0           | 1               | 3                  |
| 8         | 2            | 0           | 2               | 4                  |

**Table S2.** Gene-specific primers used for gene expression analysis by qPCR.

| Gene  | Primer Designation | Sequence (5' to 3')         |
|-------|--------------------|-----------------------------|
| GAPDH | GAPDH_F            | AAGGTGAAGGTCGGAGTCAACGGA    |
| GAPDH | GAPDH_R            | TCGCTCCTGGAAGATGGTGATGGG    |
| COX2  | COX-2_F            | TGGTCTGGTGCCTGGTCTGATGATGT  |
| COX-2 | COX-2_R            | GCCTGCTTGTCTGGAACAACCTGCTCA |
| NF-kB | NF-kB_F            | GCAATCATCCACCTTCATTCTCAACTT |
| NF-kB | NF-kB_R            | CCTCCACCACATCTTCCTGCTTAG    |
| Col10 | Col10_F            | AGCTGCCAAGGCACCATCTCCA      |
| Col10 | Col10_R            | AGTGGGCCTTTTATGCCTGTGGGC    |
| MMP3  | MMP3_F             | CGTGGCAGTTTGCTCAGCCTATCC    |
| MMP3  | MMP3_R             | GCACTTCGGGATGCCAGGAAAGGT    |
| Runx2 | Runx2_F            | TCCGCAGGTCCTACCAGCCACC      |
| Runx2 | Runx2_R            | GGTGTCCTGTGCTGAAGAGGCTGT    |
| IL6   | IL6_F              | AAGCAGCAAAGAGGCACTGGCAGAA   |
| IL6   | IL6_R              | CTGCACAGCTCTGGCTTGTTCCTCAC  |
